# Supplementary material for: Endothelial damage and a thin intercellular fibrin network promote haemorrhage in acute promyelocytic leukaemia
Source: PubMed Central journal article supplement — eBioMedicine. 2020 Sep 16;60:102992. doi: 10.1016/j.ebiom.2020.102992 (PMC7501057; doi:10.1016/j.ebiom.2020.102992), 2020-09-16

## Supplementary Results:

### Supplementary Figure S1

**ECs turned to spindle under stimulation of APL/NB4 cells.** (A) ECs cultured with RPIM1640 medium. (B-C) The morphology change of ECs cultured with NB4/APL-CM. Scale bar represents 10 $\mu$ m.

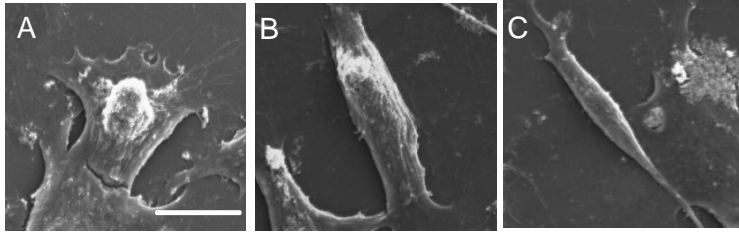

### Supplementary Figure S2

We have performed experiments exploring the effect of neutrophils on endothelial cells (ECs). We found that they didn't damage ECs under normal conditions. Scale bar represents 10 $\mu$ m.

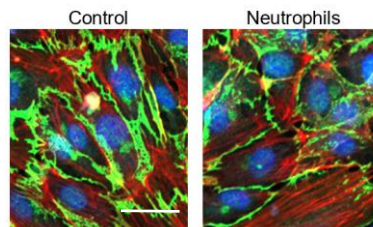

### Supplementary Figure S3

**MLCK and ROCK contribute to impaired barrier function.** Pretreatment with MLCK inhibitor ML-7(10<sup>-4</sup> mol/L) or/and with ROCK inhibitor H1152 (2.5 $\mu$ mol) for 1h, then incubated with APL cells for 16h. (A) Permeability of experimental endothelium to albumin. \*p<0.05, \*\*p<0.01. Data representative are from 6 independent experiments and represent as mean  $\pm$  SD.

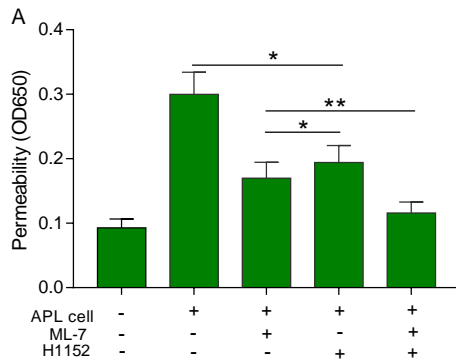

### Supplementary Figure S4

**Expression of PML-RAR $\alpha$  fusion protein in mice tissue.** Compared with control group, experimental group revealed expression of PML-RAR $\alpha$  fusion protein in hepatic, renal and brain tissue.

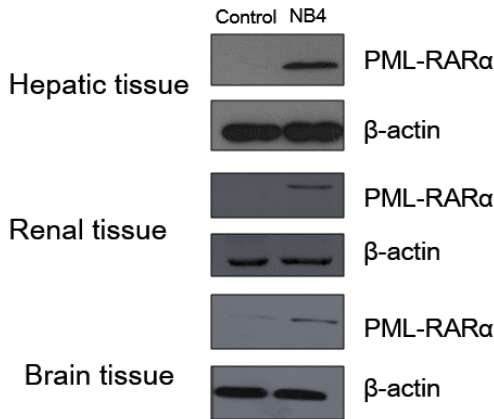

### Supplementary Figure S5

**Inhibition assay of procoagulant activity of ECs treated by APL/NB4 cell medium.** (A-B) Inhibition assay using ECs treated by RPIM1640 medium as control. Stimulated ECs were incubated with anti-TF antibody and ladtadherin. Every data represents 3 independent experiments and showed as mean  $\pm$  SD. \* $p < 0.05$  vs Baseline group; \*\* $p < 0.01$  vs anti-TF group.

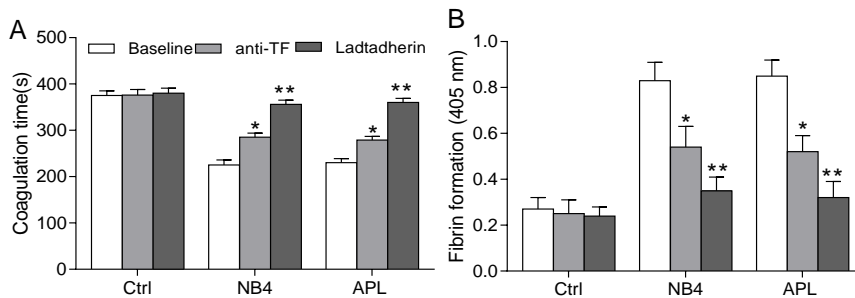

### Supplementary Figure S6

**Additional Fbg elevates the character of plasma clot.** (A) The thrombus weight of the blood samples from healthy volunteers and APL patients with or without additional fibrinogen. (B) The average fibrin clot pore size (Ks) of the samples from (A). (C) Clot lysis assays were performed using 1 nM t-PA, and the lysis time was recorded for the four groups. \* $p < 0.05$ . Data are from 6 independent experiments and represent as mean  $\pm$  SD.

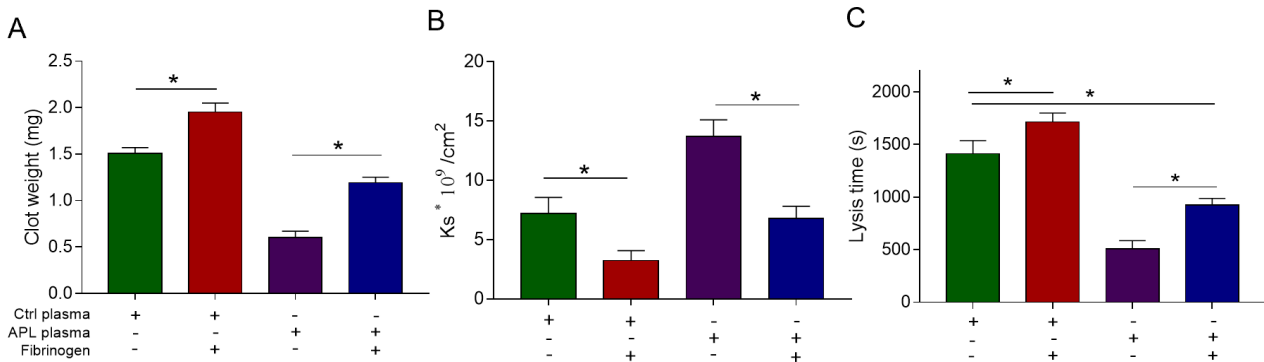

### Supplementary Figure S7

**ATRA decreases the procoagulant activity of ECs via inhibiting PS exposure.** (A) PS exposure on HUVECs over the course of treatment with NB4 only or NB4 with ATRA or ATO was measured using lactadherin labeling and flow cytometry. (B) The production of coagulation proteins for HUVECs was measured from different experimental groups. \* $p < 0.05$ , \*\* $p < 0.01$ ; # $p < 0.05$  vs the data in the control group.

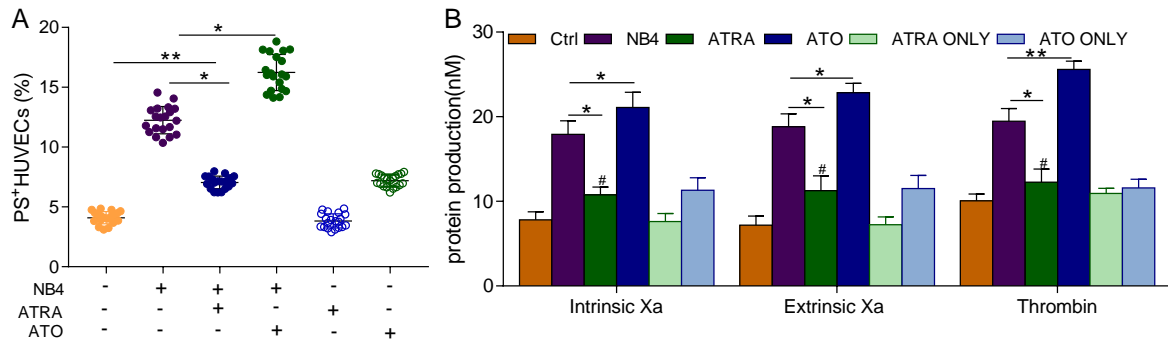

### Supplementary Figure S8

F1b

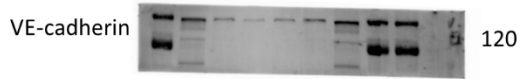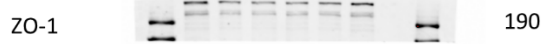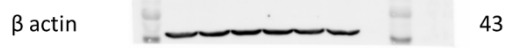

F3a+F4e

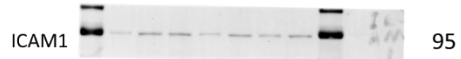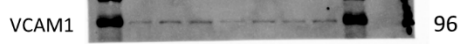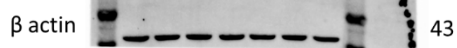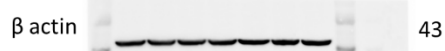

F3g and F3j

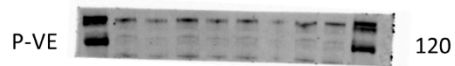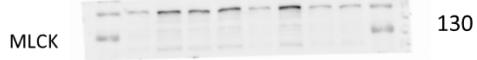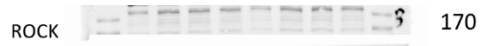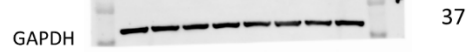

F5f

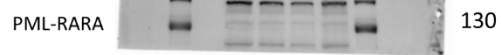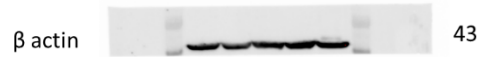

Supplement: mmc1.pdf [file mmc1.pdf]
